# Supplementary material
Source: publisher figshare collection journal article supplement (https://sage.figshare.com/ndownloader/files/36578532)
Supplement: Supplementary file 1 [file 36578532]

We searched the following terms in Sociological Abstracts: “success” AND “women” OR “women” AND “achievement” OR ‘women” AND “career” AND “success” OR “women” AND “success” AND “entrepreneurship” OR “women” AND “glass ceiling” OR “women” AND “attainment” OR “women” AND “advancement” OR “women” AND “challenges” OR “women” AND “barriers” OR “qualitative” AND “women”; SocINDEX: “career success” AND “women” OR “achievement motivation” AND “women” OR “definition of success” AND “women” OR “entrepreneurship success” AND “women” OR “meaning of success” AND “women” OR “perception of success” AND “women” OR “qualitative” AND “women” AND “success” OR “women” AND “attainment” OR “women” AND “leadership” OR “women success” OR “women’s achievement”; SCOPUS: “women's success” OR “women” AND “career success” OR “qualitative” AND “women” AND “success” OR “women” AND “attainment” OR “women” AND “achievement”; And Google Scholar: “women's advancement” OR “women’s career development” OR “women’s career success” OR “qualitative” AND “women’s success” OR “women managers” OR “women achievements” OR “women achievers” OR “women's empowerment” AND “success” OR “women” AND “attainment” OR “successful women” OR “definition of women's success”.
